# Supplementary material for: Hypervirulent Klebsiella pneumoniae Sequence Type 420 with a Chromosomally Inserted Virulence Plasmid
Source: Int J Mol Sci. 2021 Aug 25;22(17):9196. doi: 10.3390/ijms22179196 (PMC8431375; doi:10.3390/ijms22179196)
Supplement: Supplementary file 1 [file ijms-22-09196-s001.zip]

Archive with 4 entries (4 files):
- Suppl. Fig. 1.png
- Suppl. Fig. 2.png
- Suppl. Figures.pdf
- Suppl. Tables.xlsx
