# Supplementary material for: Hypervirulent Klebsiella pneumoniae Sequence Type 420 with a Chromosomally Inserted Virulence Plasmid
Source: Int J Mol Sci. 2021 Aug 25;22(17):9196. doi: 10.3390/ijms22179196 (PMC8431375; doi:10.3390/ijms22179196)
Supplement: Supplementary file 1 [file ijms-22-09196-s001.zip › Suppl. Tables.xlsx]

## Sheet: Suppl. Table 1
Supplementary Table 1: Virulence factor database (VFDB) results. Values given are % coverage (% identity). Database version 14-07-2021.
		Adherence																								Antiphagocytosis								Efflux pump		Iron uptake
		Type 3 fimbriae								Type I fimbriae										E. coli common pilus (ECP)						Capsule								AcrAB		Aerobactin					Enterobactin
Isolate	Count	mrkH	mrkI	mrkJ	mrkF	mrkD	mrkC	mrkB	mrkA	fimB	fimE	fimA	fimI	fimC	fimD	fimF	fimG	fimH	fimK	yagV/ecpE	yagW/ecpD	yagX/ecpC	yagY/ecpB	yagZ/ecpA	ykgK/ecpR	cpsACP	galF	gnd	manB	manC	ugd	wza	wzi	acrA	acrB	iucA	iucB	iucC	iucD	iutA	entA	entB	entE	entC	fepB	ybdA	fepD	fepG	fepC
PBIO2030	118	100.00 (100.00)	100.00 (99.32)	100.00 (99.86)	100.00 (100.00)	100.00 (99.60)	100.00 (99.88)	100.00 (99.72)	100.00 (99.34)	100.00 (99.34)	100.00 (99.51)	100.00 (99.64)	100.00 (99.53)	100.00 (99.59)	100.00 (99.77)	100.00 (99.44)	100.00 (99.60)	99.67 (99.12)	100.00 (98.79)	99.74 (85.54)	100.00 (88.62)	99.96 (87.38)	100.00 (87.44)	99.32 (90.07)	98.31 (86.75)	99.84 (94.59)	100.00 (99.22)	100.00 (96.73)	100.00 (98.25)	100.00 (98.31)	100.00 (96.83)	97.62 (77.60)	100.00 (87.64)	81.07 (70.10);100.00 (99.50)	95.11 (66.32);98.19 (75.62);96.70 (69.90);100.00 (99.84)	100.00 (100.00)	100.00 (100.00)	100.00 (100.00)	100.00 (100.00)	94.17 (71.35);100.00 (99.95)	100.00 (98.60)	100.00 (99.30)	100.00 (98.26)	100.00 (99.50)	100.00 (99.58)	100.00 (99.11)	100.00 (99.90)	100.00 (99.80)	100.00 (99.50)
PBIO2031	117	100.00 (100.00)	100.00 (99.32)	100.00 (99.86)	100.00 (100.00)	100.00 (99.60)	100.00 (99.88)	100.00 (99.72)	100.00 (99.34)	100.00 (99.34)	100.00 (99.51)	100.00 (99.64)	100.00 (99.53)	100.00 (99.59)	100.00 (99.77)	100.00 (99.44)	100.00 (99.60)	99.67 (99.12)	100.00 (98.79)	99.74 (85.54)	100.00 (88.62)	99.96 (87.38)	100.00 (87.44)	99.32 (90.07)	98.31 (86.75)	99.84 (94.59)	100.00 (99.22)	100.00 (96.73)	100.00 (98.25)	100.00 (98.31)	100.00 (96.83)	97.62 (77.60)	100.00 (87.64)	100.00 (99.50);81.07 (70.10)	100.00 (99.84);96.70 (69.90);95.11 (66.32);98.19 (75.62)	100.00 (100.00)	100.00 (100.00)	100.00 (100.00)	100.00 (100.00)	94.17 (71.35);100.00 (99.95)	100.00 (98.60)	100.00 (99.30)	100.00 (98.26)	100.00 (99.50)	100.00 (99.58)	100.00 (99.11)	100.00 (99.90)	100.00 (99.80)	100.00 (99.50)
[truncated: 70 more columns]

## Sheet: Suppl. Table 2
Supplementary Table 2: ResFinder database results. Values given are % coverage (% identity). Database version 14-07-2021.
Isolate	Count	oqxA	oqxB	blaSHV-75	formA	fosA6	mdf(A)	sitABCD	tet(34)
PBIO2030	8	100.00 (99.58)	100.00 (98.70)	100.00 (100.00)	99.46 (72.06)	97.00 (98.33)	99.59 (78.56)	92.97 (71.90)	75.27 (73.58)
PBIO2031	8	100.00 (99.58)	100.00 (98.70)	100.00 (100.00)	99.46 (72.06)	97.00 (98.33)	99.59 (78.56)	92.97 (71.90)	75.27 (73.58)

## Sheet: Suppl. Table 3
Supplementary Table 3: Results of phenotypic antimicrobial susceptibility testing. a MIC: minimum inhibitory concentration. b Interpretive categories according to EUCAST (The European Committee on Antimicrobial Susceptibility Testing 2020: Breakpoint tables for interpretation of MICs and zone diameters. Version 10.0.). S: Susceptible, standard dosing regimen; I: Susceptible, increased exposure; R…
	PBIO2030 (wound)		PBIO2031 (blood culture)
Antimicrobials	MICa [mg/L]	S/I/Rb	MICa [mg/L]	S/I/Rb
Ampicillin	≥32	R	≥32	R
Ampicillin/sulbactam	≤2	S	≤2	S
Piperacillin	8	S	8	S
Piperacillin/tazobactam	≤4	S	≤4	S
Cefuroxime	≤1	I	≤1	I
Cefotaxime	≤1	S	≤1	S
Cefpodoxime	≤0.25	S	≤0.25	S
Ceftazidime	≤1	S	≤1	S
Ertapenem	≤0.5	S	≤0.5	S
Imipenem	≤0.25	S	≤0.25	S
Meropenem	≤0.25	S	≤0.25	S
Ciprofloxacin	≤0.25	S	≤0.25	S
Moxifloxacin	≤0.25	S	≤0.25	S
Gentamicin	≤1	S	≤1	S
Trimethoprim/sulfamethoxazole	≤20	S	≤20	S

## Sheet: Suppl. Table 4
Supplementary Table 4: PlasmidFinder database results. Values given are % coverage (% identity). Database version 14-07-2021.
Isolate	Count	IncFII (p96A)	IncFII (pKP91)	IncHI1B (pNDM-MAR)	IncR
PBIO2030	4	72.85 (69.08)	100.00 (100.00)	100.00 (99.30)	100.00 (98.81)
PBIO2031	4	72.85 (69.08)	100.00 (100.00)	100.00 (99.30)	100.00 (98.81)

## Sheet: Suppl. Table 5
Supplementary Table 5: ISKpn74 occurrence in the K. pneumoniae PBIO2030 chromosome. a The direct repeat in the left flank of insertion sequence no. 6 (underlined) is identical to the direct repeat in the right flank of insertion sequence no. 7 (underlined) and vice versa. This is explainable by an inversion event between both elements. b The direct repeat in the right flank of insertion sequence …
No.	Start	End	Orientation	IS	Family	Sub-group	Length [bp]	IR length [bp]	IR	IRL	IRR	Left flank	Direct repeat (TSD)	Right flank	DR length [bp]	Comment
1	225726	226781	-1	ISKpn74	IS5	IS903	1056	17	GGCTTTGTTGAATAAAT	GGCTTTGTTGAATAAATCGAACTTTTGCTGAGTTGAAGGATCAGATCACG	GGCTTTGTTGAATAAATAAGATTTCGTGCGAACGACCCTGTAGCTGGCTG	CAGAGGACGTATACAGCTC	None	AGAAAGATCCTGAAAGTTG	0
2	802720	803775	-1	ISKpn74	IS5	IS903	1056	17	GGCTTTGTTGAATAAAT	GGCTTTGTTGAATAAATCGAACTTTTGCTGAGTTGAAGGATCAGATCACG	GGCTTTGTTGAATAAATAAGATTTCGTGCGAACGACCCTGTAGCTGGCTG	GACGTCGGTA	TTAAAGATG	GCCTGATTGT	9
3	812283	813338	1	ISKpn74	IS5	IS903	1056	17	GGCTTTGTTGAATAAAT	GGCTTTGTTGAATAAATCGAACTTTTGCTGAGTTGAAGGATCAGATCACG	GGCTTTGTTGAATAAATAAGATTTCGTGCGAACGACCCTGTAGCTGGCTG	CCAACAGAGA	GACTGAACC	CTACGGGAAA	9
4	1221473	1222528	1	ISKpn74	IS5	IS903	1056	17	GGCTTTGTTGAATAAAT	GGCTTTGTTGAATAAATCGAACTTTTGCTGAGTTGAAGGATCAGATCACG	GGCTTTGTTGAATAAATAAGATTTCGTGCGAACGACCCTGTAGCTGGCTG	ATCACCGTAT	ACGCTCGAT	ATCAAATCCG	9
5	1738252	1739307	1	ISKpn74	IS5	IS903	1056	17	GGCTTTGTTGAATAAAT	GGCTTTGTTGAATAAATCGAACTTTTGCTGAGTTGAAGGATCAGATCACG	GGCTTTGTTGAATAAATAAGATTTCGTGCGAACGACCCTGTAGCTGGCTG	GACAAGATAT	GCAAGTACC	TGTAAACAGC	9
6	1819473	1820528	-1	ISKpn74	IS5	IS903	1056	17	GGCTTTGTTGAATAAAT	GGCTTTGTTGAATAAATCGAACTTTTGCTGAGTTGAAGGATCAGATCACG	GGCTTTGTTGAATAAATAAGATTTCGTGCGAACGACCCTGTAGCTGGCTG	CATAGTTCAAAGGAACGGCa	None	TATTTTTGGCTTCAATTTCa	0	Inversion 6-7
7	1822577	1823632	1	ISKpn74	IS5	IS903	1056	17	GGCTTTGTTGAATAAAT	GGCTTTGTTGAATAAATCGAACTTTTGCTGAGTTGAAGGATCAGATCACG	GGCTTTGTTGAATAAATAAGATTTCGTGCGAACGACCCTGTAGCTGGCTG	AAGGCTTCATTATTTTTGGa	None	AGGAACGGCATGTTGCTCCa	0	Inversion 6-7
8	2486596	2487651	-1	ISKpn74	IS5	IS903	1056	17	GGCTTTGTTGAATAAAT	GGCTTTGTTGAATAAATCGAACTTTTGCTGAGTTGAAGGATCAGATCACG	GGCTTTGTTGAATAAATAAGATTTCGTGCGAACGACCCTGTAGCTGGCTG	AAAACCATAGCAATTGCGC	None	CGTAAAAATATAAAACGGA	0
9	2579686	2580741	1	ISKpn74	IS5	IS903	1056	17	GGCTTTGTTGAATAAAT	GGCTTTGTTGAATAAATCGAACTTTTGCTGAGTTGAAGGATCAGATCACG	GGCTTTGTTGAATAAATAAGATTTCGTGCGAACGACCCTGTAGCTGGCTG	CATTGATGTT	CATCTGATG	GTGAATCATC	9
10	4352662	4353717	-1	ISKpn74	IS5	IS903	1056	17	GGCTTTGTTGAATAAAT	GGCTTTGTTGAATAAATCGAACTTTTGCTGAGTTGAAGGATCAGATCACG	GGCTTTGTTGAATAAATAAGATTTCGTGCGAACGACCCTGTAGCTGGCTG	TGCAGTGCAG	GGAAAATAC	ATAAATAGTG	9
11	4608263	4609318	-1	ISKpn74	IS5	IS903	1056	17	GGCTTTGTTGAATAAAT	GGCTTTGTTGAATAAATCGAACTTTTGCTGAGTTGAAGGATCAGATCACG	GGCTTTGTTGAATAAATAAGATTTCGTGCGAACGACCCTGTAGCTGGCTG	CTACAAACCCCTTTTACTT	None	ATTTTCGCGATAAGCAAATb	0	Plasmid; co-integrate 11-14
12	4660903	4661958	1	ISKpn74	IS5	IS903	1056	17	GGCTTTGTTGAATAAAT	GGCTTTGTTGAATAAATCGAACTTTTGCTGAGTTGAAGGATCAGATCACG	GGCTTTGTTGAATAAATAAGATTTCGTGCGAACGACCCTGTAGCTGGCTG	TCGCTTACAG	CCTTCGTGA	TGATAAAAAC	9	Plasmid
13	4696547	4697602	1	ISKpn74	IS5	IS903	1056	17	GGCTTTGTTGAATAAAT	GGCTTTGTTGAATAAATCGAACTTTTGCTGAGTTGAAGGATCAGATCACG	GGCTTTGTTGAATAAATAAGATTTCGTGCGAACGACCCTGTAGCTGGCTG	ATAATTGTGCATGTCAAAG	None	GAAAGAACTTTAAAAGCAA	0	Plasmid
14	4797377	4798432	-1	ISKpn74	IS5	IS903	1056	17	GGCTTTGTTGAATAAAT	GGCTTTGTTGAATAAATCGAACTTTTGCTGAGTTGAAGGATCAGATCACG	GGCTTTGTTGAATAAATAAGATTTCGTGCGAACGACCCTGTAGCTGGCTG	CTCTATGACGATTTTCGCGb	None	GGCCGTGGCCGACGCCAGT	0	Plasmid; co-integrate 11-14
